# Genome-wide gene expression profiling reveals that cuticle alterations and P450 detoxification are associated with pyrethroid resistance in *Anopheles arabiensis* populations from Ethiopia

Running Title: malaria vector insecticide resistance

Eba Alemayehu Simma<sup>1, 2, \*</sup>, Wannes Dermauw<sup>2, \*</sup>, Vasileia Balabanidou<sup>3,4</sup>, Simon Snoeck<sup>2</sup>, Astrid Bryon<sup>2</sup>, Richard M. Clark<sup>5,6</sup>, Delenasaw Yewhalaw<sup>7,8</sup>, John Vontas<sup>3,9</sup>, Luc Duchateau<sup>10</sup>, Thomas Van Leeuwen<sup>2, \*\*</sup>

<sup>1</sup>Department of Biology, College of Natural Sciences, Jimma University, Jimma, Ethiopia

<sup>2</sup>Department of Plants and Crops, Faculty of Bioscience Engineering, Ghent University, Coupure links 653, 9000 Ghent, Belgium

<sup>3</sup>Institute of Molecular Biology and Biotechnology, Foundation for Research and Technology-Hellas, Heraklion 70013, Greece

<sup>4</sup>Department of Biology, University of Crete, Vassilika Vouton, Heraklion 70013, Greece

<sup>5</sup>School of Biological Sciences, University of Utah, 257 South 1400 East, Salt Lake City, Utah, 84112, USA.

<sup>6</sup>Center for Cell and Genome Science, University of Utah, 257 South 1400 East, Salt Lake City, Utah, 84112, USA

<sup>7</sup>School of Medical Laboratory Sciences, College of Health Sciences, Jimma University, Jimma, Ethiopia

<sup>8</sup>Tropical and Infectious Diseases Research Center, Jimma University, Jimma, Ethiopia

<sup>9</sup>Department of Crop Science, Pesticide Science Lab, Agricultural University of Athens, Athens, Greece

<sup>10</sup>Department of Nutrition, Genetics and Ethology, Ghent University, Heidestraat 19, 9820 Merelbeke, Belgium

\* Eba Alemayehu Simma and Wannes Dermauw should be considered as joint first author

\*\* corresponding author:

Prof. dr. ir. Thomas Van Leeuwen  
Laboratory of Agrozoology  
Department of Plants and Crops  
Faculty of Bioscience Engineering  
Ghent University  
Coupure Links 653, 9000 Ghent, Belgium  
Telephone: +32(0)9 264 61 43  
[thomas.vanleeuwen@ugent.be](mailto:thomas.vanleeuwen@ugent.be)

## Abstract

**BACKGROUND:** Vector control is the main intervention in malaria control and elimination strategies. However, the development of insecticide resistance is one of the major challenges for controlling malaria vectors. *Anopheles arabiensis* populations in Ethiopia showed resistance against both DDT and the pyrethroid deltamethrin. Although a L1014F target-site resistance mutation was present in the voltage gated sodium channel of investigated populations, the levels of resistance and biochemical studies indicated the presence of additional resistance mechanisms. In this study, we used genome-wide transcriptome profiling by RNAseq to assess differentially expressed genes between three deltamethrin and DDT resistant *An. arabiensis* field populations (Tolay, Asendabo, Chewaka) and two susceptible strains (Sekoru and Mozambique).

**RESULTS:** Both RNAseq analysis and RT-qPCR showed that a glutathione-S-transferase, *gstd3*, and a cytochrome P450 monooxygenase, *cyp6p4*, were significantly overexpressed in the group of resistant populations compared to the susceptible strains, suggesting that the enzymes they encode play a key role in metabolic resistance against deltamethrin or DDT. Furthermore, a gene ontology enrichment analysis showed that expression changes of cuticle related genes were strongly associated with insecticide resistance, although this did not translate in increased thickness of the procuticle.

**CONCLUSION:** Our transcriptome sequencing of deltamethrin/DDT resistant *An. arabiensis* populations from Ethiopia suggests non-target site resistance mechanisms and pave the way for further investigation of the role of cuticle composition in resistance.

### Keywords:

*Anopheles arabiensis*, RNAseq, metabolic resistance, Ethiopia, pyrethroid, cuticular hydrocarbons

## 1 **1. Introduction**

2  
3 Vector control is the main intervention in malaria control and elimination strategies.  
4 Indoor residual spraying and insecticide-treated nets have made substantial contributions to  
5 the reduction of malaria incidence.<sup>1,2</sup> However, the development of insecticide resistance in  
6 the major anopheline malaria vectors threatens the global effort to control malaria.<sup>3-5</sup> Some  
7 *Anopheles gambiae* mosquito populations now show resistance to all insecticide classes and  
8 the strengths, and the impact of resistance is escalating every year.<sup>6</sup> High levels of insecticide  
9 resistance have also been reported for *An. arabiensis* in many countries, including Ethiopia<sup>7-</sup>  
10<sup>11</sup>, where we recently surveyed several populations across the country and showed that these  
11 *An. arabiensis* populations exhibited countrywide resistance against DDT and the pyrethroid  
12 deltamethrin.<sup>12</sup>

13  
14 Understanding the molecular mechanisms underlying resistance has the potential to  
15 aid developing of strategies to prevent and/or delay the spread of insecticide resistance in  
16 malaria vectors including *An. arabiensis*.<sup>13</sup> Resistance mechanisms can be classified into two  
17 mechanisms. Alterations of the target-site, for example by point mutations, which reduce the  
18 susceptibility to pesticides, are known as toxicodynamic mechanisms. Increased  
19 detoxification, decreased penetration, sequestration or increased excretion of insecticides  
20 through qualitative or quantitative changes of enzymes/proteins are known as toxicokinetic  
21 mechanisms.<sup>14,15</sup> Finally, behavioral mechanisms, such as avoidance of insecticide exposure,  
22 have been proposed as a third resistance mechanism, but up until now no conclusive evidence  
23 has been reported that supports this type of resistance mechanism.<sup>16</sup>

24  
25 Several variants in the *knockdown resistance (kdr)* gene, encoding the voltage-gated  
26 sodium channel (VGSC), have been shown to be, or are associated with, pesticide resistance  
27 in malaria vectors. The VGSC is the target-site of pyrethroids and DDT. Pyrethroids are  
28 currently the main insecticide class used to control malaria vectors.<sup>3</sup> Several mutations in the  
29 VGSC that confer pyrethroid resistance have been reported in *Anopheles* vectors.<sup>17</sup> These  
30 result in the substitution of leucine 1014 (TTA) to phenylalanine (TTT) (*kdr* L1014F) or to  
31 serine (TCA) (*kdr* L1014S). Additionally, a N1575Y mutation in VGSC was reported to have  
32 a synergistic effect with the L1014F mutation, and has so far has been observed in *An.*  
33 *gambiae* and *An. coluzzi* species<sup>18,19</sup>, but not in *An. arabiensis*. A G119S mutation in the  
34 target-site of organophosphates and carbamates, acetyl-choline esterase 1 (AChE1), has been

35 described for resistant *An. gambiae* populations in West-Africa<sup>20, 21</sup>, as well as more recently  
36 in *An. arabiensis*<sup>22</sup>. Last, the GABA-gated chloride channel is known as the target of  
37 cyclodienes and resistance mutations (A301S, V332I and T350S) in the gene encoding this  
38 channel (*resistance to dieldrin, rdl*) were shown to confer cyclodiene resistance in anopheline  
39 populations.<sup>23, 24</sup>

40

41 In addition to target-site resistance, cytochrome P450 monooxygenases (P450s) are the  
42 most important enzyme family involved in toxicokinetic resistance mechanisms of insects to  
43 pyrethroids.<sup>3, 17</sup> In many resistant strains of *Anopheles* species, P450s have been shown to be  
44 overexpressed and able to metabolize pyrethroids<sup>25-28</sup>. For example, the P450s encoded by  
45 *cyp6m2* and *cyp6p3*, the most widely over-expressed P450s in pyrethroid resistant field  
46 populations of *An. gambiae*, are both capable of metabolizing pyrethroids.<sup>25, 26, 28</sup> In some  
47 cases, overexpressed P450s also confer resistance to insecticide classes other than  
48 pyrethroids. For example, *An. gambiae* CYP6M2 and CYP6P3 can metabolize the  
49 organochlorine DDT and the carbamate bendiocarb, respectively.<sup>29, 30</sup> Further, the P450s  
50 CYP6P4 and CYP4G16 have been associated with pyrethroid resistance in *An. arabiensis*.<sup>31</sup>  
51 <sup>32</sup> Ibrahim *et al.* 2016 showed that CYP6P4 plays a key role in pyrethroid resistance of *An.*  
52 *arabiensis* populations from Central Africa (Chad), and that it can metabolize the pyrethroids  
53 permethrin, bifenthrin and  $\lambda$ -cyhalothrin, but not deltamethrin.<sup>31</sup> Another P450, CYP4G16,  
54 has been associated not with pyrethroid metabolism directly, but with the increased  
55 biosynthesis of epicuticular hydrocarbons that delay insecticide uptake.<sup>33</sup> Notably, in addition  
56 to epicuticular hydrocarbon enrichment, compositional changes of the cuticle have also been  
57 associated with insecticide resistance and several genes have been associated with the  
58 phenomenon.<sup>34</sup> Finally, glutathione-S-transferases (GSTs) are also important enzymes  
59 involved in toxicokinetic resistance mechanisms against pyrethroids.<sup>35-38</sup> For example,  
60 Riveron *et al.* 2014, 2017, showed that allelic variation and higher transcription of GSTe2  
61 confers resistance against permethrin in an *An. gambiae* population of Benin.<sup>35, 36</sup> However,  
62 the role of such GST-based quantitative and qualitative changes has not yet been investigated  
63 in pyrethroid resistant *An. arabiensis*.

64

65 Recently, we surveyed several *An. arabiensis* populations from Ethiopia and showed  
66 that all these populations exhibited resistance against DDT and the pyrethroid deltamethrin.<sup>12</sup>  
67 The frequency of the target-site resistance mutation L1014F in the VGSC was high in some  
68 populations, but resistance levels suggested additional resistance mechanisms, as has been

69 observed in other *Anopheles* species.<sup>39-41</sup> In contrast to *An. gambiae*, only few genome-wide  
70 gene expression studies have investigated insecticide resistance in *An. arabiensis*  
71 populations<sup>32, 42, 43</sup>, and none of them focused on Ethiopian populations. In this study, we  
72 performed genome-wide transcriptome profiling (RNAseq, Illumina platform) with three  
73 resistant populations and two reference susceptible *An. arabiensis* strains from Ethiopia and  
74 identified candidate genes and mechanisms for insecticide resistance in this important malaria  
75 vector.

76

## 77 **2. Materials and methods**

### 78 **2.1. Mosquito populations**

79 *An. arabiensis* larvae were collected in the South-West part of Ethiopia from a range of  
80 breeding sites: Asendabo (ASN), Chewaka (CHW) and Tolay (TOL) (Figure S1). Larvae  
81 were reared to adults on site in rooms with standard conditions of  $25 \pm 2^\circ\text{C}$  and a relative  
82 humidity of  $80 \pm 10\%$  for all three respective sites. Larvae were fed with dog biscuits and  
83 brewery yeast whereas adults were provided a 10% sucrose solution soaked into cotton pads  
84 <sup>44</sup>. ASN, CHW and TOL were previously shown to be resistant against deltamethrin and DDT  
85 <sup>12</sup>. Two laboratory strains served as pesticide susceptible populations: an Ethiopian strain  
86 (Sekoru (SEK)), previously described in Alemayehu *et al.* 2017, and a strain from  
87 Mozambique (MOZ) previously described in Witzig *et al.* 2014.<sup>12, 45</sup> Both laboratory strains  
88 were reared in a similar way as the three Ethiopian populations collected from the field.

89

### 90 **2.2. RNA extraction**

91 Batches of five 3-5-day-old, non-blood-fed *An. arabiensis* female mosquitoes from each  
92 population (ASN, CHW or TOL) or strain (SEK, MOZ) were preserved in RNAlater  
93 (Ambion, Thermo Fischer Scientific) in a 1.5ml Eppendorf tubes. In total, between eighty to  
94 hundred adult females were collected for each population/strain. All tubes were stored at  $-80$   
95  $^\circ\text{C}$ . The field-collected samples were transported on dry ice to the laboratory of Agrozoology,  
96 Department of Plants and Crops (University of Ghent, Belgium). Total RNA was extracted  
97 from batches of ten female mosquitoes using the RNAqueous®-4PCR Total RNA isolation  
98 Kit (Ambion, Thermo Fischer Scientific). RNA was treated with DNase1 and DNase was  
99 inactivated according to the instructions for the RNAqueous®-4PCR Kit. Four biological  
100 replicates were included for each population or laboratory strain. Total RNA samples were

101 quantified with a DeNovix DS-11 spectrophotometer (DeNovix, USA) and visualized by  
102 running an aliquot on a 1% agarose gel.

103

### 104 **2.3. RNAseq library preparation and sequencing**

105 Illumina libraries were constructed with the TruSeq Stranded mRNA Library Preparation Kit  
106 with polyA selection (Illumina, USA), and the resulting libraries were sequenced on an  
107 Illumina HiSeq 2500 instrument to generate strand-specific, paired-end reads of length 125 bp  
108 (HiSeq SBS Kit v4 sequencing reagents). Library construction and sequencing was performed  
109 at the High-Throughput Genomics and Bioinformatic Analysis Shared Resource at Huntsman  
110 Cancer Institute (University of Utah, Salt Lake City, UT, USA). According to FastQC version  
111 0.11.4<sup>46</sup> no reads were tagged as poor quality. The RNAseq expression data generated during  
112 the current study are available in the Gene-Expression Omnibus (GEO) repository with  
113 accession number [GSE121006](https://www.ncbi.nlm.nih.gov/geo/query/acc.cgi?acc=GSE121006) (reviewer token: qjkresexnwjluf).

114

### 115 **2.4. Differential expression and Gene Ontology (GO) enrichment analysis**

116 All reads were aligned to the nuclear genome<sup>47</sup> and mitochondrial genome (GenBank  
117 accession: NC\_028212) of *An. arabiensis* using HISAT2<sup>48</sup> and the following options “--max-  
118 intronlen 75000 --rna-strandness RF --known-splicesite-infile splicesites.txt”. The  
119 “splicesites.txt” file was generated from the gene transfer format (GTF) files of the nuclear  
120 and mitochondrial genome of *An. arabiensis* using a script accompanying the HISAT2  
121 software (hisat2\_extract\_splice\_sites.py). For the nuclear genome, the AaraD1.6 GTF  
122 annotation file was used (13830 genes of which 13452 are protein coding genes, released 25  
123 April 2017 at VectorBase<sup>49</sup>, [https://www.vectorbase.org/organisms/anopheles-  
124 arabiensis/dongola/aarad16](https://www.vectorbase.org/organisms/anopheles-arabiensis/dongola/aarad16)); for the mitochondrial genome a GTF file was generated from the  
125 GenBank file ([NC\\_028212.1](https://www.ncbi.nlm.nih.gov/GenBank/NC_028212.1)) using the bp\_genbank2gff3.pl and gffread script included in the  
126 BioPerl (<http://bioperl.org/>) and Cufflinks package<sup>50</sup>, respectively (see File S1 for the *An.*  
127 *arabiensis* GTF used for mapping). Resulting BAM files were subsequently sorted by read  
128 name using SAMtools version 1.5.<sup>51</sup> Next, read counts per gene were obtained using the  
129 htseq-count script included in the HTSeq package, version 0.9.0<sup>52</sup>, with the following settings  
130 “-i gene\_id -t exon -f bam -s reverse.”. Differential gene expression (DE) analyses were  
131 performed using DESeq2 (version 1.12.2).<sup>53</sup> Differentially expressed genes (DEGs), as  
132 assessed with a fold change (FC)  $\geq 2$  and Benjamini-Hochberg adjusted *p*-value (FDR)  $<$   
133 0.05, were determined between each resistant population and each susceptible strain (six  
134 comparisons in total: ASN vs. MOZ, ASN vs. SEK, CHW vs. MOZ, CHW vs. SEK, TOL vs.



135 MOZ and TOL vs. SEK, Figure 2). For the DESeq2 output of all comparisons, a GO  
136 enrichment analysis was performed using the Bioconductor package GOSep (version 1.24.0)  
137 with FDR = 0.05. The GOSep package takes into account gene selection bias due to  
138 differences in gene (median transcript) length. GO terms for *An. arabiensis* nuclear genes  
139 were downloaded from VectorBase (<https://www.vectorbase.org/>)<sup>49</sup> using BioMart, while the  
140 GO terms for *An. arabiensis* mitochondrial genes were identified using InterProScan version  
141 version 5.25-64.0, available at the EMBL-EBI website  
142 (<https://www.ebi.ac.uk/interpro/interproscan.html>).

143

## 144 **2.5. Principal component analysis and gene expression heatmap**

145 A Principal Component Analysis (PCA) was performed as described by Love *et al.* 2015.<sup>54</sup>  
146 Briefly, read counts were first normalized using the regularized-logarithm (rlog)  
147 transformation implemented in the DESeq2 (version 1.12.2) R-package. A PCA was then  
148 performed using the stats (version 3.3.0), ggbiplot (version 0.55) and ggplot2 (version 2.2.0)  
149 R-packages with the 1000 most variable genes across all RNAseq samples and the ggbiplot  
150 argument ellipse.prob set to 0.95. Gene expression patterns of cuticle related genes were  
151 visualized with heatmaps generated with the relative transcript levels (fold changes) of four  
152 DE analyses (ASN vs. SEK, CHW vs. SEK, TOL vs. SEK and MOZ vs. SEK) with the limma  
153 (version 3.28.21) and gplots (version 3.0.1) packages in the R environment. Cuticle related  
154 genes were selected based on the following InterPro domains: IPR000618 (Insect cuticle  
155 protein), IPR031311 (Chitin-binding type R&R consensus), IPR002557 (Chitin binding  
156 domain), IPR004302 (Cellulose/chitin-binding protein, N-terminal), IPR004835 (Chitin  
157 synthase), IPR031874 (Adult cuticle protein 1) and IPR22727 (Pupal cuticle protein C1).

158

## 159 **2.6. RT-qPCR validation**

160 A subset of *An. arabiensis* DEGs was selected for RT-qPCR validation. Gene specific RT-  
161 qPCR primers were designed using Primer3 v.4.1.0.<sup>55</sup> All primer sequences can be found in  
162 Table S1. Total RNA was extracted as described above and cDNA was synthesized with the  
163 Maxima First Strand cDNA synthesis for RT-qPCR kit (Fermentas Life Sciences, Aalst,  
164 Belgium) starting with 2 µg of total RNA as template. Three biological and two technical  
165 replicates were included for each population as well as non-template controls to exclude  
166 sample contamination. The RT-qPCR analysis was performed on a Mx3005P qPCR thermal  
167 cycler (Stratagene, Agilent Technologies, Diegem, Belgium) with Maxima SYBR Green  
168 qPCR Master Mix (2x) and ROX solution (Fermentas Life Sciences) according to the

169 manufacturer's instructions. qPCR run conditions were: 95°C for 10 m followed by 35 cycles  
170 of 95 °C for 15 s, 55 °C for 30 s and 72 °C for 30 s. At the end, a melting curve was generated  
171 from 65 °C to 95 °C, 1 °C per 2 s to check for the presence of a single amplicon. Fourfold  
172 dilution series of pooled cDNA were used to determine the standard curves and amplification  
173 efficiencies for every gene-specific primer pair. Relative expression levels and significant  
174 gene expression differences (one-sided unpaired t-test) were calculated with qbase+ version  
175 3.0.<sup>56</sup>

176

## 177 **2.7. Analysis of mutations involved in insecticide resistance**

178 The presence of mutations involved in *Anopheles* sp. resistance against either DDT,  
179 pyrethroids, cyclodienes or organophosphates (I114T and L119F in *gste2* (AARA008732)<sup>36</sup>,  
180 <sup>40</sup>, L1014C/F/S/W and N1575Y in *vgsc* (AARA016386) (*Musca domestica* numbering<sup>17, 19</sup>,  
181 <sup>57</sup>), A301S, V332I and T350S in *rdl* (AARA016354) (*Drosophila melanogaster* numbering<sup>24</sup>,  
182 <sup>58</sup>) and G119S in *AChE1* (AARA010659) (*Torpedo californica* numbering<sup>20, 22</sup>)) was  
183 investigated by creating a Variant Call Format (VCF) file from the BAM files employed for  
184 analyzing differential gene expression (see above). The BAM files were used as input for  
185 SAMtools version 1.4.1<sup>51</sup> with the following settings “mpileup -uf --output-tags “AD,DP””.  
186 Subsequently, the SAMtools output was used as input for BCFtools 1.5.1<sup>51</sup> with the following  
187 settings “call -vc”. The effect of single nucleotide polymorphism (SNPs) and small indels on  
188 coding sequences in genomic regions were predicted using SNPeff v. 4.3t<sup>59</sup> with a custom-  
189 built *An. arabiensis* coding sequence database (AaraD1.6 annotation for the *A. arabiensis*  
190 nuclear genome and NC\_028212.1 for the mitochondrial genome) available at VectorBase<sup>49</sup>.  
191 Mutation frequencies in target-site genes were calculated based on the frequencies of the  
192 reference (“REF”) and alternative (“ALT”) alleles in the allelic depth (“AD”) tag in the  
193 SAMtools output.

## 194 **2.8. Cuticle measurements with transmission electron microscopy**

195 The cuticle thickness of mosquito legs from the ASN population and the SEK strain was  
196 measured by transmission electron microscopy (TEM), as previously described.<sup>33</sup> Only the  
197 procuticle thickness was measured as the epicuticle layer was abraded in more than 95% of  
198 sections during the multiple hexane washes. Only individuals with similar wing size were  
199 selected and further analyzed by TEM. Ultra-thin gold sections of the femur leg segment were  
200 taken from female mosquitoes and observed under a high-resolution JEM 2-100 transmission  
201 electron microscope (JEOL) at an operating voltage of 80 kV. Raw TEM images were analyzed



202 in Image J version 1.52e.<sup>60</sup> Femur leg sections were taken from five random mosquitoes of each  
203 populations/strain. In total, 25 and 32 sections were measured for SEK and ASN, respectively.  
204 A Mann-Whitney *U* test (R-framework) was used to test for a significant difference in the  
205 thickness of the leg procuticle.

206  
207

### 208 **3. Results**

209  
210

#### 210 **3.1. RNA sequencing**

211 Illumina sequencing generated ~ 95-110 million strand-specific, paired-end reads per sample.  
212 Alignment of RNAseq reads against the *An. arabiensis* annotation resulted in an overall  
213 percent alignment rate of 89.2±0.7 (mean ± standard error of the mean, SE) across all samples  
214 (Table S2).

215

#### 216 **3.2. Principal Component Analysis (PCA)**

217 A PCA using the 1000 most variable genes across all RNAseq samples revealed that 34.7 %  
218 of the total variation could be explained by PC1 while 32.8 % could be explained by PC2  
219 (Figure 1). RNAseq replicates clustered by population/strain, either on PC1 (SEK) or both  
220 PC1 and PC2 (ASN, CHW, MOZ and TOL). RNAseq replicates of two resistant *An.*  
221 *arabiensis* populations, ASN and TOL, clustered together and away from those of the two  
222 susceptible strains (SEK and MOZ) while RNAseq replicates of the third resistant population,  
223 CHW, clustered between RNAseq replicates of ASN/TOL populations and RNAseq replicates  
224 of the susceptible SEK strain.

225

#### 226 **3.3. Differential gene expression analysis**

227 We used DESeq2 to perform a differential gene expression (DE) analysis ((foldchange (FC) ≥  
228 2 and a FDR < 0.05) between each resistant *An. arabiensis* population (ASN, CHW or TOL)  
229 and each of the susceptible *An. arabiensis* strains (SEK or MOZ). 496, 152 and 602 genes  
230 were overexpressed by two-fold or more, while 286, 109 and 197 *An. arabiensis* genes were  
231 underexpressed by twofold or more in ASN, CHW and TOL compared to the susceptible  
232 strain SEK, respectively. 936, 460 and 814 genes were overexpressed by twofold or more,  
233 while 798, 576 and 654 genes were underexpressed by twofold or more in ASN, CHW and  
234 TOL compared to the susceptible strain MOZ, respectively (Figure 2, Table S3). Not  
235 surprisingly, the total number of DEGs was lower for the DE analyses between one of the

236 resistant populations (ASN, CHW and TOL) and a susceptible strain from the same country  
237 of origin (SEK, Ethiopia) compared to DE analyses using a susceptible strain from a different  
238 country of origin (MOZ, Mozambique). Inspecting the overlap of DEGs between the two DE  
239 analyses (against either SEK or MOZ) performed for each resistant population revealed that  
240 303, 66 and 337 genes were overexpressed and 48, 14 and 29 genes were underexpressed in  
241 ASN, CHW or TOL compared to both SEK and MOZ, respectively. Furthermore, thirty-eight  
242 and four DEGs (hereafter named “core” DEGs) were over- and underexpressed, respectively,  
243 in each resistant population and for each comparison (Figure 2, Figure 3). The 38  
244 overexpressed “core” DEGs coded for 14 uncharacterized proteins, 13 cuticle related proteins  
245 (either with an “insect cuticle protein” domain (IPR000618), a “chitin binding” domain  
246 (IPR002557) or defined as a “cuticle protein” by VectorBase), 2 nicotinic Acetylcholine  
247 Receptor subunits (nAChRs), Yellow-e, chitin synthase, GSTD3, a protein with a protein  
248 kinase domain (IPR011009), a nuclear-pore complex protein, a pyroglutamyl-peptidase, a  
249 thioester containing protein (tep1), a serine-type endopeptidase and a vitamin K-dependent  
250 protein C-like. The four underexpressed “core” DEGS coded for an uncharacterized protein, a  
251 protein (FBN8) with a fibrinogen domain (InterPro domain IPR002181), a G-protein coupled  
252 receptor (GPCR) and a dynein assembly factor. Of particular note, in line with the PCA in  
253 which the replicates of the resistant CHW population clustered most closely to those of the  
254 SEK strain, the CHW population had the lowest number of DEGs (against either SEK or  
255 MOZ) and almost all “core” DEGs (34/38) had a lower fold change in the CHW comparisons  
256 than in ASN or TOL comparisons (Figure 3). Finally, the fold changes of a selection of DEGs  
257 determined by DE analysis was shown to be consistent with those obtained by RT-qPCR  
258 (Figure 4, Figure S2).

259

### 260 **3.4. GO enrichment analysis**

261 A Gene Ontology (GO) enrichment was performed for each DE analysis using Goseq. A list  
262 of over- and underrepresented GOs for each comparison (six in total) can be found in Table  
263 S4. Those GO Molecular Function terms that were significantly overrepresented in both  
264 comparisons of a resistant population (against SEK or MOZ) are shown in Figure 5. For at  
265 least five out of 6 comparisons the GO-terms “structural component of the cuticula”  
266 (GO:0042302), “chitin-binding” (GO:0008061), “serine type endopeptidase” (GO:0004252)  
267 and “heme” (GO:0020037) were significantly overrepresented, while “oxidoreductase  
268 activity” (GO:0016705), “monooxygenase activity” (GO:0004497) and “iron ion binding”  
269 (GO:0005506) were overrepresented in at least one DE analysis of a resistant population. The

270 GO enrichment results are also reflected in an expression heatmap of cuticle related genes,  
271 with clear expression pattern differences between the comparison of resistant populations  
272 against SEK and the comparison of MOZ against SEK (Figure S3).

273

### 274 **3.5. Gene expression levels of P450s and GSTs in deltamethrin/DDT resistant *An.*** 275 ***arabiensis* populations**

276 All significantly overexpressed genes (FDR < 0.05, Table S3) were mined for members of  
277 detoxification gene families known to be involved in metabolic resistance against pyrethroids  
278 (P450s and GSTs, see Introduction). Only *gstd3* was significantly overexpressed in each  
279 comparison of a resistant *An. arabiensis* population against one of the susceptible strains  
280 (SEK or MOZ) (Figure 3, Table S3). Next, we investigated the expression level of genes  
281 encoding *Anopheles* P450s and GSTs known to metabolize pyrethroids (CYP6M2, CYP6P3,  
282 CYP6P4 and GSTE<sup>25, 26, 31, 36</sup>). *Cyp6m2*, *cyp6p3* and *cyp6p4* were significantly  
283 overexpressed in all comparisons against MOZ (log<sub>2</sub>FC ranging from 2.2 to 3.6). *Cyp6p4* was  
284 significantly overexpressed in the comparison of each resistant strain against SEK, *cyp6p3*  
285 was significantly overexpressed in the comparison of CHW against SEK (log<sub>2</sub>FC of 1.0)  
286 while *cyp6m2* was not significantly overexpressed in any of the comparisons against SEK.  
287 *Gste2* was significantly overexpressed in CHW against MOZ and in the comparisons of ASN  
288 and TOL against either SEK or MOZ (Table S3). A similar trend could be observed for the  
289 expression values obtained by RT-qPCR, with fold changes of *cyp6m2*, *cyp6p3*, *cyp6p4* and  
290 *gste2* being higher in the comparisons against MOZ compared to comparisons against SEK  
291 (Figure 4). Furthermore, we also evaluated the expression of *cyp4g16*, a gene encoding a  
292 P450 catalyzing epicuticular hydrocarbon biosynthesis. This gene was significantly  
293 overexpressed in all comparisons against MOZ and SEK. RT-qPCR data confirmed *cyp4g16*  
294 overexpression in the case of ASN or TOL versus SEK. Finally, both RNAseq data and RT-  
295 qPCR data showed that *cyp4c28*, a P450 gene previously shown to be overexpressed in  
296 resistant *Anopheles* sp.<sup>43, 61</sup>, was significantly overexpressed in all comparisons against SEK,  
297 but not against MOZ (Figure 4)

298

### 299 **3.6. Detection of mutations involved in insecticide resistance**

300 The RNAseq reads of all resistant populations and susceptible strains were mined for  
301 mutations involved in resistance against either DDT, pyrethroids, cyclodienes and  
302 organophosphates (Table S5). None of the known *gste2* and *AChE1* resistance mutations  
303 could be identified in the RNAseq reads of the populations/strains of this study. The L1014F

304 mutation in the *vgsc* (A2532T, codon change of TTA to TTT, in the coding sequence of  
305 AARA016386-RA) was identified in all resistant populations (ASN, CHW and TOL) and the  
306 susceptible SEK strain. Finally, the A301S mutation in *Rdl* (G886T, codon change of GCA to  
307 TCA, in the coding sequence of AARA016354-RA) was identified in two resistant  
308 populations (CHW and ASN) and in the susceptible SEK strain (Table S5).

309

### 310 **3.7. Procuticle thickness in mosquito legs**

311 The leg procuticle thicknesses of the deltamethrin/DDT resistant population (ASN) and the  
312 susceptible strain (SEK) were  $2.40 \pm 0.12 \mu\text{m}$  and  $2.41 \pm 0.06 \mu\text{m}$  (mean  $\pm$  SE), respectively,  
313 and were not significantly different ( $p > 0.05$ ) (Figure 6).

314

## 315 **4. Discussion**

316 *An. arabiensis* is one of the dominant vector species of malaria in sub-saharan Africa  
317 including Ethiopia<sup>62</sup>, where resistance of *An. arabiensis* against pyrethroids and DDT is  
318 widespread.<sup>10</sup> In many Ethiopian *An. arabiensis* populations an association between the *kdr*  
319 mutation in the VGSC and resistance to pyrethroids and DDT resistance has been observed.<sup>7,</sup>  
320 <sup>9, 10, 12</sup> However, a number of studies have also pointed to increased detoxification as  
321 important in resistant populations, as the resistance phenotype is strong, and because *kdr*  
322 mutations were not fixed at the population level.<sup>10, 12</sup> Metabolic resistance has been observed  
323 in other pyrethroid and DDT resistant *An. arabiensis* populations from East-Africa, but the  
324 putative involvement of genes encoding detoxification enzymes associated with metabolic  
325 resistance was only investigated for populations from Tanzania and Sudan using a whole-  
326 genome microarray.<sup>32, 42, 43</sup> In this study, we expand our previous work on resistance  
327 monitoring of Ethiopian *An. arabiensis* populations<sup>12</sup> and used Illumina sequencing to  
328 quantify gene expression levels in deltamethrin and DDT resistant *An. arabiensis* populations  
329 from three different sites in Ethiopia - Asendabo (ASN), Chewaka (CHW) and Tolay (TOL)  
330 and in two deltamethrin and DDT susceptible laboratory strains, MOZ and SEK (Figure 2).

331

332 First, we mined Illumina RNAseq data to assess the prevalence of mutations  
333 previously associated with insecticide resistance in *Anopheles* species. We also estimated the  
334 frequency of these mutations, but as both gene expression and allele-specific gene expression  
335 can significantly influence the accuracy of allele frequency estimation<sup>41, 63</sup> we did not  
336 integrate these results into the discussion section of this study. None of the populations

337 harbored mutations in the *gste2* gene nor in the *AChE1* gene, but in both ASN, CHW and  
338 SEK an A301S mutation in the *Rdl* gene, associated with resistance against cyclodienes,  
339 could be identified (Table S5, see also Introduction). The presence of the A301S mutation  
340 most likely reflects the long historical use of cyclodienes in malaria vector control.<sup>64</sup> In  
341 addition, although Ethiopia banned cyclodienes in 2004<sup>65</sup>, cyclodienes such as endosulfan and  
342 chlordane are still detectable in environmental samples from some regions of Ethiopia.<sup>66, 67</sup> In  
343 line with Alemayehu *et al.* 2017, all three resistant populations (ASN, CHW and TOL) harbor  
344 the *kdr* mutation L1014F while the N1575Y mutation was absent.<sup>12</sup> We also identified the  
345 L1014F mutation in the deltamethrin and DDT susceptible SEK strain (Table S5).

346

347 Because target site mutations are unlikely to fully explain high-level resistance in  
348 Ethiopian populations (<sup>10, 12</sup> and see above), we performed a differential gene expression  
349 analysis between each deltamethrin and DDT resistant *An. arabiensis* population (ASN, CHW  
350 or TOL) and both susceptible strains (SEK or MOZ) (Figure 2). The differential expression  
351 was more pronounced, both in number of DEGs and in magnitude of differential expression,  
352 for the comparison of the Ethiopian resistant populations against MOZ (Figure 2, Table S3).  
353 This might reflect genetic (and expression) variation by distance, as the MOZ strain  
354 originated from Mozambique, while SEK is a strain from Ethiopian. Consistent with a role in  
355 resistance, we found that members of detoxification gene families known to be involved in  
356 metabolic resistance of anopheline mosquitoes against pyrethroids and/or DDT varied in  
357 expression in our study. According to the RNAseq and/or RT-qPCR data, *cyp6p4* was  
358 significantly overexpressed in the resistant strains (ASN, CHW or TOL) compared to any of  
359 the susceptible strains (MOZ or SEK) (Figure 4, Table S3). Recently, it has been shown that  
360 CYP6P4 is the major P450 responsible for pyrethroid resistance in a *kdr*-free population  
361 of *An. arabiensis* from Chad. However, although it was shown that this P450 could  
362 metabolize several Type I and Type II pyrethroids, it could only bind to deltamethrin and not  
363 metabolize this compound.<sup>31</sup> Thus, the overexpression of *cyp6p4* in ASN, CHW and TOL  
364 might be related to resistance against pyrethroids other than deltamethrin. It remains to be  
365 tested whether resistance to such pyrethroids (e.g., permethrin and lambda-cyhalothrin) is  
366 present in these Ethiopian populations.<sup>12</sup> Only in CHW, *cyp6p3* and *cyp6m2* were  
367 significantly overexpressed as compared to both susceptible strains (Figure 4, Table S3).  
368 Previously, *An. gambiae* CYP6P3 and CYP6M2 were shown to metabolize deltamethrin  
369 and/or DDT, and hence the overexpression of their orthologue in CHW might contribute to  
370 metabolic resistance against these insecticides.<sup>25, 26, 29</sup> In 2014, Riveron *et al.* showed that

371 *An. funestus* GSTE2 was able to metabolize DDT. For both ASN and TOL, *gste2* was  
372 significantly overexpressed compared to both susceptible strains, suggesting this enzyme  
373 might also play a role in metabolic DDT resistance in Ethiopian *An. arabiensis* populations.  
374 Last, *gstd3* was significantly overexpressed for each comparison of a resistant population  
375 against a susceptible strain (Figure 3, Table S3). *Gstd3* overexpression has been reported for  
376 several pyrethroid and DDT resistant *Anopheles* populations<sup>35, 68, 69</sup>, but at present the role of  
377 delta class GSTs is thought to be minor compared to those of the epsilon class (e.g., GSTE2,  
378 see above) and functional validation of the interaction between GSTD3 and  
379 DDT/deltamethrin is needed to understand the contribution of this GST towards  
380 DDT/deltamethrin resistance.<sup>68</sup>

381

382 Including *gstd3*, 41 genes belonged to the “core DEGs” set that were differentially  
383 expressed in each resistant population and for each comparison (against SEK or MOZ).  
384 Thirteen (32%) of these 41 genes encode cuticular proteins that are overexpressed, while  
385 others encode chitin synthase, yellow-e protein, serine-type endopeptidase, uncharacterized  
386 proteins and two nicotinic acetyl-choline receptors (AChRs) beta subunits (Figure 3). It has  
387 been shown that pyrethroids exert (secondary) non-specific inhibitory effects on nicotinic  
388 AChRs<sup>70</sup> and as such their upregulation in the resistant *An. arabiensis* strains might be a way  
389 to compensate for non-specific nAChR inhibition. To complement our set of “core DEGs”,  
390 we also performed a GO analysis for each DE comparison (Figure 5). In agreement with the  
391 expression analysis of the major detoxification genes involved in deltamethrin/DDT  
392 resistance (see above), GO-terms related to P450 activity were significantly enriched in at  
393 least one of the different DEG sets. In addition, also in line with our set of “core DEGs”, three  
394 GO-terms related to changes in the cuticula were significantly enriched in nearly every DEG  
395 set (Figure 5). This is also reflected in a heatmap of expression changes of cuticle related  
396 genes in deltamethrin/DDT resistant populations ASN, CHW and TOL, as shown in Figure  
397 S3. Higher expression of cuticular genes has previously been reported for pyrethroid resistant  
398 mosquito populations<sup>32, 71-75</sup> and in some cases was associated with a thicker cuticula.<sup>73, 74</sup>  
399 Further, some of these *Anopheles* cuticular genes were also shown to be expressed in the  
400 limbs, the most frequent site of contact with insecticides.<sup>76</sup> Apart from genes encoding  
401 cuticular proteins, *cyp4g16*, which encodes a P450 that catalyzes epicuticular hydrocarbon  
402 biosynthesis, has also been reported to be frequently overexpressed in insecticide  
403 resistant *Anopheles* mosquitoes, including *An. arabiensis*<sup>32-34, 42, 73, 77</sup>. This has led to the



404 suggestion that CYP4G16 plays a role in insecticide resistance via enrichment of the cuticular  
405 hydrocarbon (CHC) content.<sup>33</sup>

406

407 According to our differential expression analysis (RNAseq and/or RT-qPCR data, see  
408 Figure 4 and Table S3), *cyp4g16* was overexpressed as compared to both susceptible strains  
409 in the ASN and TOL populations. Both mechanisms (a greater cuticle thickness by cuticle  
410 protein overexpression or CHC enrichment of the epicuticle) might reduce the penetration rate  
411 of insecticide and may enhance resistance by increasing the time available for metabolic  
412 processes to inactivate the insecticide before it causes target-site inhibition. We therefore  
413 measured the thickness of the procuticle (comprising an exo-, meso- and endocuticle)<sup>78</sup> of a  
414 representative resistant population (ASN) and a susceptible strain (SEK). In contrast to  
415 Yahouédo et al. (2017), who found that the procuticle of a resistant *An. gambiae* strain was  
416 thicker than that of a susceptible strain<sup>73</sup>, we did not detect a statistical difference between the  
417 average leg procuticle thickness of the resistant population and susceptible strain of this study  
418 (Figure 6). However, in Balabanidou *et al.* 2016 the epicuticle, layered on top of the  
419 procuticle, was the main contributor to differences in cuticle thickness between pyrethroid  
420 resistant and susceptible populations.<sup>33</sup> Unfortunately, we were not able to measure epicuticle  
421 thickness in this study as the epicuticle was not preserved in the majority (> 95%) of the *An.*  
422 *arabiensis* leg sections. Alternatively, it could be that the epicuticle of the resistant Ethiopian  
423 *An. arabiensis* populations has a higher CHC content compared to those of the susceptible  
424 strains, and hence determining CHC levels in both resistant populations and susceptible  
425 strains merits further investigation. On the other hand, in contrast to altered thickness or CHC  
426 levels, it could be that a change in composition of the cuticle is associated with  
427 deltamethrin/DDT resistance, as reviewed by Balabanidou *et al.*<sup>34</sup> For example, a gene  
428 encoding a laccase with a key-role in sclerotization was overexpressed in a resistant *Culex*  
429 population.<sup>79</sup> Strikingly, in our study, the gene *yellow-e* was overexpressed in each  
430 comparison of a resistant population to each of the susceptible strains (Figure 3). In *Tribolium*  
431 *castaneum*, YELLOW-E was shown to have an important role in cuticle  
432 pigmentation/tanning<sup>80</sup> and, hence, its overexpression in *An. arabiensis* populations might  
433 lead to an altered cuticle, possibly reducing the penetration rate of deltamethrin or DDT.  
434 Future work should study the role of cuticle composition as a potential resistance factor in  
435 Ethiopian populations of *An. arabiensis*.

436

437

## 438 **Author Contributions**

439 ES, TVL and LD conceived and designed study. ES and VB performed experiments. WD, ES,  
440 SS and AB analyzed data. WD and ES wrote the manuscript, with input from JV, RMC, DY,  
441 LD and TVL. All authors read and approved the final manuscript.

## 442 **Acknowledgements**

443  
444 The authors are grateful to Flemish Interuniversity Council (VLIR-UOS) for the financial  
445 support of this study. We thank Robert Greenhalgh for assistance in managing Illumina read  
446 data and would like to acknowledge the assistants of the Tropical and Infectious Diseases  
447 Research Center (TIDRC) for their technical support during field and preliminary lab work.  
448 WD is a postdoctoral fellow of the Research Foundation-Flanders (FWO). This project was  
449 funded by the Research Foundation Flanders (FWO, Belgium) (grant G009312N to TVL and  
450 grant G053815N to TVL and WD) and by the European Union Horizon 2020 Framework  
451 Program (688207-DMC-MALVEC) to JV and DY. VB was supported by a Scholarship for  
452 Strengthening Post-Doctoral Research from The Greek State Scholarships Foundation (IKY)  
453 within the framework of the Operational Programme “Human Resources Development  
454 Program, Education and Life-Long Learning”. Research reported in this publication utilized  
455 the High-Throughput Genomics and Bioinformatic Analysis Shared Resource at Huntsman  
456 Cancer Institute at the University of Utah and was supported by the National Cancer Institute  
457 of the National Institutes of Health under Award Number P30CA042014. The content is  
458 solely the responsibility of the authors and does not necessarily represent the official views of  
459 the funding agencies.

460

## 461 **References**

462

- 463 1. Bhatt S, Weiss DJ, Cameron E, Bisanzio D, Mappin B, Dalrymple U, Battle KE, Moyes CL,  
464 Henry A, Eckhoff PA, Wenger EA, Briët O, Penny MA, Smith TA, Bennett A, Yukich J,  
465 Eisele TP, Griffin JT, Fergus CA, Lynch M, Lindgren F, Cohen JM, Murray CLJ, Smith DL,  
466 Hay SI, Cibulskis RE and Gething PW, The effect of malaria control on *Plasmodium*  
467 *falciparum* in Africa between 2000 and 2015. *Nature* **526**: 207 (2015).
- 468 2. World Health Organisation. World Malaria Report. Geneva: World Health Organisation  
469 (2017).
- 470 3. Ranson H, N’Guessan R, Lines J, Moiroux N, Nkuni Z and Corbel V, Pyrethroid resistance in  
471 African anopheline mosquitoes: what are the implications for malaria control? *Trends*  
472 *Parasitol* **27**: 91-98 (2011).
- 473 4. Ranson H and Lissenden N, Insecticide resistance in African *Anopheles* mosquitoes: a  
474 worsening situation that needs urgent action to maintain malaria control. *Trends Parasitol* **32**:  
475 187-196 (2016).

- 476 5. Riveron JM, Chiumia M, Menze BD, Barnes KG, Irving H, Ibrahim SS, Weedall GD,  
477 Mzilahowa T and Wondji CS, Rise of multiple insecticide resistance in *Anopheles funestus* in  
478 Malawi: a major concern for malaria vector control. *Malar J* **14**: 344 (2015).
- 479 6. Edi C, V. A., Koudou BG, Jones CM, Weetman D and Ranson H, Multiple-Insecticide  
480 resistance in *Anopheles gambiae* mosquitoes, Southern Côte d'Ivoire. *Emerg Infect Dis* **18**:  
481 1508 (2012).
- 482 7. Yewhalaw D, Bortel WV, Denis L, Coosemans M, Duchateau L and Speybroeck N, First  
483 evidence of high knockdown resistance frequency in *Anopheles arabiensis* (Diptera:  
484 Culicidae) from Ethiopia. *Am J Trop Med Hyg* **83**: 122-125 (2010).
- 485 8. Balkew M, Ibrahim M, Koekemoer LL, Brooke BD, Engers H, Aseffa A, Gebre-Michael T  
486 and Elhassen I, Insecticide resistance in *Anopheles arabiensis* (Diptera: Culicidae) from  
487 villages in central, northern and south west Ethiopia and detection of kdr mutation. *Parasit*  
488 *Vectors* **3**: 40 (2010).
- 489 9. Fettene M, Olana D, Christian RN, Koekemoer LL and Coetzee M, Insecticide Resistance in  
490 *Anopheles arabiensis* from Ethiopia. *Afr Entomol* **21**: 89-94 (2013).
- 491 10. Messenger LA, Shililu J, Irish SR, Anshebo GY, Tesfaye AG, Ye-Ebiyo Y, Chibsa S, Dengela  
492 D, Dissanayake G, Kebede E, Zemene E, Asale A, Yohannes M, Taffese HS, George K,  
493 Fornadel C, Seyoum A, Wirtz RA and Yewhalaw D, Insecticide resistance in *Anopheles*  
494 *arabiensis* from Ethiopia (2012–2016): a nationwide study for insecticide resistance  
495 monitoring. *Malar J* **16**: 469 (2017).
- 496 11. Hemming-Schroeder E, Strahl S, Yang E, Nguyen A, Lo E, Zhong D, Atieli H, Githeko A and  
497 Yan G, Emerging pyrethroid resistance among *Anopheles arabiensis* in Kenya. *Am J Trop*  
498 *Med Hyg* **98**: 704-709 (2018).
- 499 12. Alemayehu E, Asale A, Eba K, Getahun K, Tushune K, Bryon A, Morou E, Vontas J, Van  
500 Leeuwen T, Duchateau L and Yewhalaw D, Mapping insecticide resistance and  
501 characterization of resistance mechanisms in *Anopheles arabiensis* (Diptera: Culicidae) in  
502 Ethiopia. *Parasit Vectors* **10**: 407 (2017).
- 503 13. Clarkson CS, Temple HJ and Miles A, The genomics of insecticide resistance: insights from  
504 recent studies in African malaria vectors. *Curr Opin Insect Sci* **27**: 111-115 (2018).
- 505 14. Hemingway J and Ranson H, Insecticide resistance in insect vectors of human disease. *Annu*  
506 *Rev Entomol* **45**: 371-391 (2000).
- 507 15. Feyereisen R, Dermauw W and Van Leeuwen T, Genotype to phenotype, the molecular and  
508 physiological dimensions of resistance in arthropods. *Pestic Biochem Physiol* **121**: 61-77  
509 (2015).
- 510 16. Zalucki MP and Furlong MJ, Behavior as a mechanism of insecticide resistance: evaluation of  
511 the evidence. *Curr Opin Insect Sci* **21**: 19-25 (2017).
- 512 17. Liu N, Insecticide Resistance in Mosquitoes: Impact, Mechanisms, and Research Directions.  
513 *Annu Rev Entomol* **60**: 537-559 (2015).
- 514 18. Edi A, N'Dri B, Chouaibou M, Kouadio F, Pignatelli P, Raso G, Weetman D and Bonfoh B,  
515 First detection of N1575Y mutation in pyrethroid resistant *Anopheles gambiae* in Southern  
516 Côte d'Ivoire [version 1; referees: 2 approved]. *Wellcome Open Res* **2**: doi:  
517 10.12688/wellcomeopenres.12246.12681 (2017).
- 518 19. Jones CM, Liyanapathirana M, Agossa FR, Weetman D, Ranson H, Donnelly MJ and Wilding  
519 CS, Footprints of positive selection associated with a mutation (N1575Y) in the voltage-gated  
520 sodium channel of *Anopheles gambiae*. *Proc Natl Acad Sci U S A* **109**: 6614-6619 (2012).
- 521 20. Weill M, Malcolm C, Chandre F, Mogensen K, Berthomieu A, Marquine M and Raymond M,  
522 The unique mutation in ace-1 giving high insecticide resistance is easily detectable in  
523 mosquito vectors. *Insect Mol Biol* **13**: 1-7 (2004).
- 524 21. Weetman D, Mitchell SN, Wilding CS, Birks DP, Yawson AE, Essandoh J, Mawejje HD,  
525 Djogbenou LS, Steen K, Rippon EJ, Clarkson CS, Field SG, Rigden DJ and Donnelly MJ,  
526 Contemporary evolution of resistance at the major insecticide target site gene Ace-1 by  
527 mutation and copy number variation in the malaria mosquito *Anopheles gambiae*. *Mol Ecol*  
528 **24**: 2656-2672 (2015).
- 529 22. Dabiré RK, Namountougou M, Diabaté A, Soma DD, Bado J, Toé HK, Bass C and Combarry  
530 P, distribution and frequency of kdr mutations within *Anopheles gambiae* s.l. populations and

- 531 first report of the ace.1g119s mutation in *Anopheles arabiensis* from Burkina Faso (West  
532 Africa). *PLoS ONE* **9**: e101484 (2014).
- 533 23. Wondji CS, Dabire RK, Tukur Z, Irving H, Djouaka R and Morgan JC, Identification and  
534 distribution of a GABA receptor mutation conferring dieldrin resistance in the malaria vector  
535 *Anopheles funestus* in Africa. *Insect Biochem Mol Biol* **41**: 484-491 (2011).
- 536 24. Yang C, Huang Z, Li M, Feng X and Qiu X, RDL mutations predict multiple insecticide  
537 resistance in *Anopheles sinensis* in Guangxi, China. *Malar J* **16**: 482 (2017).
- 538 25. Müller P, Warr E, Stevenson BJ, Pignatelli PM, Morgan JC, Steven A, Yawson AE, Mitchell  
539 SN, Ranson H, Hemingway J, Paine MJI and Donnelly MJ, Field-caught permethrin-resistant  
540 *Anopheles gambiae* overexpress CYP6P3, a P450 that metabolises pyrethroids. *PLoS Genet* **4**:  
541 e1000286 (2008).
- 542 26. Stevenson BJ, Bibby J, Pignatelli P, Muangnoicharoen S, O'Neill PM, Lian L-Y, Müller P,  
543 Nikou D, Steven A, Hemingway J, Sutcliffe MJ and Paine MJI, Cytochrome P450 6M2 from  
544 the malaria vector *Anopheles gambiae* metabolizes pyrethroids: Sequential metabolism of  
545 deltamethrin revealed. *Insect Biochem Mol Biol* **41**: 492-502 (2011).
- 546 27. Riveron JM, Irving H, Ndula M, Barnes KG, Ibrahim SS, Paine MJI and Wondji CS,  
547 Directionally selected cytochrome P450 alleles are driving the spread of pyrethroid resistance  
548 in the major malaria vector *Anopheles funestus*. *Proc Natl Acad Sci U S A* **110**: 252-257  
549 (2013).
- 550 28. David J-P, Ismail HM, Chandor-Proust A and Paine MJI, Role of cytochrome P450s in  
551 insecticide resistance: impact on the control of mosquito-borne diseases and use of  
552 insecticides on Earth. *Philos Trans R Soc Lond B Biol Sci* **368**: 20120429 (2013).
- 553 29. Mitchell SN, Stevenson BJ, Müller P, Wilding CS, Egyir-Yawson A, Field SG, Hemingway J,  
554 Paine MJI, Ranson H and Donnelly MJ, Identification and validation of a gene causing cross-  
555 resistance between insecticide classes in *Anopheles gambiae* from Ghana. *Proc Natl Acad Sci*  
556 *U S A* **109**: 6147-6152 (2012).
- 557 30. Edi CV, Djogbénou L, Jenkins AM, Regna K, Muskavitch MAT, Poupardin R, Jones CM,  
558 Essandoh J, Kétoh GK, Paine MJI, Koudou BG, Donnelly MJ, Ranson H and Weetman D,  
559 CYP6 P450 enzymes and Ace-1 duplication produce extreme and multiple insecticide  
560 resistance in the malaria mosquito *Anopheles gambiae*. *PLoS Genet* **10**: e1004236 (2014).
- 561 31. Ibrahim SS, Riveron JM, Stott R, Irving H and Wondji CS, The cytochrome P450 CYP6P4 is  
562 responsible for the high pyrethroid resistance in knockdown resistance-free *Anopheles*  
563 *arabiensis*. *Insect Biochem Mol Biol* **68**: 23-32 (2016).
- 564 32. Jones CM, Haji KA, Khatib BO, Bagi J, Mcha J, Devine GJ, Daley M, Kabula B, Ali AS,  
565 Majambere S and Ranson H, The dynamics of pyrethroid resistance in *Anopheles arabiensis*  
566 from Zanzibar and an assessment of the underlying genetic basis. *Parasit Vectors* **6**: 343  
567 (2013).
- 568 33. Balabanidou V, Kampouraki A, MacLean M, Blomquist GJ, Tittiger C, Juárez MP,  
569 Mijailovsky SJ, Chalepakis G, Anthousi A, Lynd A, Antoine S, Hemingway J, Ranson H,  
570 Lycett GJ and Vontas J, Cytochrome P450 associated with insecticide resistance catalyzes  
571 cuticular hydrocarbon production in *Anopheles gambiae*. *Proc Natl Acad Sci U S A* **113**: 9268-  
572 9273 (2016).
- 573 34. Balabanidou V, Grigoraki L and Vontas J, Insect cuticle: a critical determinant of insecticide  
574 resistance. *Curr Opin Insect Sci* **27**: 68-74 (2018).
- 575 35. Riveron JM, Ibrahim SS, Mulamba C, Djouaka R, Irving H, Wondji MJ, Ishak IH and Wondji  
576 CS, Genome-wide transcription and functional analyses reveal heterogeneous molecular  
577 mechanisms driving pyrethroids resistance in the major malaria vector *Anopheles funestus*  
578 across Africa. *G3* **7**: 1819-1832 (2017).
- 579 36. Riveron JM, Yunta C, Ibrahim SS, Djouaka R, Irving H, Menze BD, Ismail HM, Hemingway  
580 J, Ranson H, Albert A and Wondji CS, A single mutation in the GSTe2 gene allows tracking  
581 of metabolically based insecticide resistance in a major malaria vector. *Genome Biol* **15**: R27  
582 (2014).
- 583 37. Wilding CS, Weetman D, Rippon EJ, Steen K, Maweje HD, Barsukov I and Donnelly MJ,  
584 Parallel evolution or purifying selection, not introgression, explains similarity in the



- 585 pyrethroid detoxification linked GSTE4 of *Anopheles gambiae* and *An. arabiensis*. *Mol Genet*  
586 *Genomics* **290**: 201-215 (2015).
- 587 38. Pavlidi N, Vontas J and Van Leeuwen T, The role of glutathione S-transferases (GSTs) in  
588 insecticide resistance in crop pests and disease vectors. *Curr Opin Insect Sci* **27**: 97-102  
589 (2018).
- 590 39. Vontas J, Grigoraki L, Morgan J, Tsakireli D, Fuseini G, Segura L, Niemczura de Carvalho J,  
591 Nguema R, Weetman D, Slotman MA and Hemingway J, Rapid selection of a pyrethroid  
592 metabolic enzyme CYP9K1 by operational malaria control activities. *Proc Natl Acad Sci U S*  
593 *A* **115**: 4619-4624 (2018).
- 594 40. Mitchell SN, Rigden DJ, Dowd AJ, Lu F, Wilding CS, Weetman D, Dadzie S, Jenkins AM,  
595 Regna K, Boko P, Djogbenou L, Muskavitch MAT, Ranson H, Paine MJI, Mayans O and  
596 Donnelly MJ, Metabolic and target-site mechanisms combine to confer strong DDT resistance  
597 in *Anopheles gambiae*. *PLoS ONE* **9**: e92662 (2014).
- 598 41. Bonizzoni M, Ochomo E, Dunn WA, Britton M, Afrane Y, Zhou G, Hartsel J, Lee M-C, Xu J,  
599 Githeko A, Fass J and Yan G, RNA-seq analyses of changes in the *Anopheles gambiae*  
600 transcriptome associated with resistance to pyrethroids in Kenya: identification of candidate-  
601 resistance genes and candidate-resistance SNPs. *Parasit Vectors* **8**: 474 (2015).
- 602 42. Matowo J, Jones CM, Kabula B, Ranson H, Steen K, Mosha F, Rowland M and Weetman D,  
603 Genetic basis of pyrethroid resistance in a population of *Anopheles arabiensis*, the primary  
604 malaria vector in Lower Moshi, north-eastern Tanzania. *Parasit Vectors* **7**: 274 (2014).
- 605 43. Abdalla H, Wilding CS, Nardini L, Pignatelli P, Koekemoer LL, Ranson H and Coetzee M,  
606 Insecticide resistance in *Anopheles arabiensis* in Sudan: temporal trends and underlying  
607 mechanisms. *Parasit Vectors* **7**: 213 (2014).
- 608 44. Gerberg EJ, Barnard DR and Ward RA. *Manual for mosquito rearing and experimental*  
609 *techniques*. American Mosquito Control Association, Inc., Lake Charles, (1994).
- 610 45. Witzig C, Parry M, Morgan JC, Irving H, Steven A, Cuamba N, Kerah-Hinzoumbé C, Ranson  
611 H and Wondji CS, Genetic mapping identifies a major locus spanning P450 clusters associated  
612 with pyrethroid resistance in *kdr*-free *Anopheles arabiensis* from Chad. *Heredity* **110**: 389-397  
613 (2013).
- 614 46. Andrews S, FastQC, a quality control tool for high throughput sequence data.  
615 <https://www.bioinformatics.babraham.ac.uk/projects/fastqc/> [accessed 2015].
- 616 47. Neafsey DE, Waterhouse RM, Abai MR, Aganezov SS, Alekseyev MA, Allen JE, Amon J,  
617 Arcà B, Arensburger P, Artemov G, Assour LA, Basseri H, Berlin A, Birren BW, Blandin SA,  
618 Brockman AI, Burkot TR, Burt A, Chan CS, Chauve C, Chiu JC, Christensen M, Costantini  
619 C, Davidson VLM, Deligianni E, Dottorini T, Dritsou V, Gabriel SB, Guelbeogo WM, Hall  
620 AB, Han MV, Hlaing T, Hughes DST, Jenkins AM, Jiang X, Jungreis I, Kakani EG, Kamali  
621 M, Kempainen P, Kennedy RC, Kirmiziloglou IK, Koekemoer LL, Laban N, Langridge N,  
622 Lawniczka MKN, Lirakis M, Lobo NF, Lowy E, MacCallum RM, Mao C, Maslen G, Mbogo  
623 C, McCarthy J, Michel K, Mitchell SN, Moore W, Murphy KA, Naumenko AN, Nolan T,  
624 Novoa EM, O'Loughlin S, Oringanje C, Oshaghi MA, Pakpour N, Papathanos PA, Peery AN,  
625 Povelones M, Prakash A, Price DP, Rajaraman A, Reimer LJ, Rinker DC, Rokas A, Russell  
626 TL, Sagnon NF, Sharakhova MV, Shea T, Simão FA, Simard F, Slotman MA, Somboon P,  
627 Stegny V, Struchiner CJ, Thomas GWC, Tojo M, Topalis P, Tubio JMC, Unger MF, Vontas  
628 J, Walton C, Wilding CS, Willis JH, Wu Y-C, Yan G, Zdobnov EM, Zhou X, Catteruccia F,  
629 Christophides GK, Collins FH, Cornman RS, Crisanti A, Donnelly MJ, Emrich SJ, Fontaine  
630 MC, Gelbart W, Hahn MW, Hansen IA, Howell PI, Kafatos FC, Kellis M, Lawson D, Louis  
631 C, Luckhart S, Muskavitch MAT, Ribeiro JM, Riehle MA, Sharakhov IV, Tu Z, Zwiebel LJ  
632 and Besansky NJ, Highly evolvable malaria vectors: The genomes of 16 *Anopheles*  
633 mosquitoes. *Science* **347**: 1258522 (2015).
- 634 48. Kim D, Langmead B and Salzberg SL, HISAT: a fast spliced aligner with low memory  
635 requirements. *Nat Meth* **12**: 357 (2015).
- 636 49. Giraldo-Calderón GI, Emrich SJ, MacCallum RM, Maslen G, Dialynas E, Topalis P, Ho N,  
637 Gesing S, the VectorBase C, Madey G, Collins FH and Lawson D, VectorBase: an updated  
638 bioinformatics resource for invertebrate vectors and other organisms related with human  
639 diseases. *Nucleic Acids Res* **43**: D707-D713 (2015).

- 640 50. Trapnell C, Roberts A, Goff L, Pertea G, Kim D, Kelley DR, Pimentel H, Salzberg SL, Rinn  
641 JL and Pachter L, Differential gene and transcript expression analysis of RNA-seq  
642 experiments with TopHat and Cufflinks. *Nature Protocols* **7**: 562 (2012).
- 643 51. Li H, Handsaker B, Wysoker A, Fennell T, Ruan J, Homer N, Marth G, Abecasis G, Durbin R  
644 and Genome Project Data Processing S, The Sequence Alignment/Map format and SAMtools.  
645 *Bioinformatics* **25**: 2078-2079 (2009).
- 646 52. Anders S, Pyl PT and Huber W, HTSeq—a Python framework to work with high-throughput  
647 sequencing data. *Bioinformatics* **31**: 166-169 (2015).
- 648 53. Love MI, Huber W and Anders S, Moderated estimation of fold change and dispersion for  
649 RNA-seq data with DESeq2. *Genome Biol* **15**: 550 (2014).
- 650 54. Love M, Anders S, Kim V and Huber W, RNA-Seq workflow: gene-level exploratory analysis  
651 and differential expression [version 1; referees: 2 approved]. *F1000Research* **4**(2015).
- 652 55. Rozen S and Skaletsky H. Primer3 on the WWW for general users and for biologist  
653 programmers. In *Bioinformatics Methods and Protocols*, ed. by Misener S and Krawetz SA.  
654 Humana Press: Totowa, NJ, pp. 365-386 (1999).
- 655 56. Hellemans J, Mortier G, De Paepe A, Speleman F and Vandesompele J, qBase relative  
656 quantification framework and software for management and automated analysis of real-time  
657 quantitative PCR data. *Genome Biol* **8**: R19 (2007).
- 658 57. Martinez-Torres D, Chandre F, Williamson MS, Darriet F, Bergé JB, Devonshire AL, Guillet  
659 P, Pasteur N and Pauron D, Molecular characterization of pyrethroid knockdown resistance  
660 (kdr) in the major malaria vector *Anopheles gambiae* s.s. *Insect Mol Biol* **7**: 179-184 (1998).
- 661 58. Du W, Awolola TS, Howell P, Koekemoer LL, Brooke BD, Benedict MQ, Coetzee M and  
662 Zheng L, Independent mutations in the Rdl locus confer dieldrin resistance to *Anopheles*  
663 *gambiae* and *An. arabiensis*. *Insect Mol Biol* **14**: 179-183 (2005).
- 664 59. Cingolani P, Platts A, Wang LL, Coon M, Nguyen T, Wang L, Land SJ, Lu X and Ruden DM,  
665 A program for annotating and predicting the effects of single nucleotide polymorphisms,  
666 SnpEff. *Fly* **6**: 80-92 (2012).
- 667 60. Schneider CA, Rasband WS and Eliceiri KW, NIH Image to ImageJ: 25 years of image  
668 analysis. *Nat Meth* **9**: 671 (2012).
- 669 61. Nkya TE, Akhouayri I, Poupardin R, Batengana B, Mosha F, Magesa S, Kisinza W and David  
670 J-P, Insecticide resistance mechanisms associated with different environments in the malaria  
671 vector *Anopheles gambiae*: a case study in Tanzania. *Malar J* **13**: 28 (2014).
- 672 62. Coetzee M, Craig M and le Sueur D, Distribution of African Malaria Mosquitoes Belonging to  
673 the *Anopheles gambiae* Complex. *Parasitol Today* **16**: 74-77 (2000).
- 674 63. Konczal M, Koteja P, Stuglik MT, Radwan J and Babik W, Accuracy of allele frequency  
675 estimation using pooled RNA-Seq. *Mol Ecol Resour* **14**: 381-392 (2013).
- 676 64. Georghiou GP. The effect of agrochemicals on vector populations. In *Pesticide Resistance in*  
677 *Arthropods*, ed. by Roush RT and Tabashnik BE. Springer: Boston, MA, pp. 183-202 (1990).
- 678 65. Stockholm Convention, Status of Ratification.  
679 [http://chm.pops.int/Countries/StatusofRatifications/PartiesandSignatoires/tabid/4500/Default.a](http://chm.pops.int/Countries/StatusofRatifications/PartiesandSignatoires/tabid/4500/Default.aspx)  
680 [spx](http://chm.pops.int/Countries/StatusofRatifications/PartiesandSignatoires/tabid/4500/Default.aspx) [accessed August 1 2018].
- 681 66. Teklu BM. Environmental risk assessment of pesticides in Ethiopia: a case of surface water  
682 systems. Wageningen University, Wageningen, (2016).
- 683 67. Westbom R, Hussen A, Megersa N, Retta N, Mathiasson L and Björklund E, Assessment of  
684 organochlorine pesticide pollution in Upper Awash Ethiopian state farm soils using selective  
685 pressurised liquid extraction. *Chemosphere* **72**: 1181-1187 (2008).
- 686 68. Jones CM, Toé HK, Sanou A, Namountougou M, Hughes A, Diabaté A, Dabiré R, Simard F  
687 and Ranson H, Additional selection for insecticide resistance in urban malaria vectors: DDT  
688 Resistance in *Anopheles arabiensis* from Bobo-Dioulasso, Burkina Faso. *PLoS ONE* **7**:  
689 e45995 (2012).
- 690 69. Djègbè I, Agossa FR, Jones CM, Poupardin R, Cornelié S, Akogbéto M, Ranson H and Corbel  
691 V, Molecular characterization of DDT resistance in *Anopheles gambiae* from Benin. *Parasit*  
692 *Vectors* **7**: 409 (2014).



- 693 70. Oortgiesen M, van Kleef RGDM and Vijverberg HPM, Effects of pyrethroids on  
694 neurotransmitter-operated ion channels in cultured mouse neuroblastoma cells. *Pestic*  
695 *Biochem Physiol* **34**: 164-173 (1989).
- 696 71. Vontas J, David JP, Nikou D, Hemingway J, Christophides GK, Louis C and Ranson H,  
697 Transcriptional analysis of insecticide resistance in *Anopheles stephensi* using cross-species  
698 microarray hybridization. *Insect Mol Biol* **16**: 315-324 (2007).
- 699 72. Awolola TS, Oduola OA, Strode C, Koekemoer LL, Brooke B and Ranson H, Evidence of  
700 multiple pyrethroid resistance mechanisms in the malaria vector *Anopheles gambiae* sensu  
701 stricto from Nigeria. *Trans R Soc Trop Med Hyg* **103**: 1139-1145 (2009).
- 702 73. Yahouédo GA, Chandre F, Rossignol M, Ginibre C, Balabanidou V, Mendez NGA, Pigeon O,  
703 Vontas J and Cornelie S, Contributions of cuticle permeability and enzyme detoxification to  
704 pyrethroid resistance in the major malaria vector *Anopheles gambiae*. *Scientific Rep* **7**: 11091  
705 (2017).
- 706 74. Huang Y, Guo Q, Sun X, Zhang C, Xu N, Xu Y, Zhou D, Sun Y, Ma L, Zhu C and Shen B,  
707 *Culex pipiens pallens* cuticular protein CPLCG5 participates in pyrethroid resistance by  
708 forming a rigid matrix. *Parasit Vectors* **11**: 6 (2018).
- 709 75. Nkya TE, Poupardin R, Laporte F, Akhouayri I, Mosha F, Magesa S, Kisinza W and David J-  
710 P, Impact of agriculture on the selection of insecticide resistance in the malaria vector  
711 *Anopheles gambiae*: a multigenerational study in controlled conditions. *Parasit Vectors* **7**: 480  
712 (2014).
- 713 76. Vannini L, Reed TW and Willis JH, Temporal and spatial expression of cuticular proteins of  
714 *Anopheles gambiae* implicated in insecticide resistance or differentiation of M/S incipient  
715 species. *Parasit Vectors* **7**: 24 (2014).
- 716 77. Toé KH, N'Falé S, Dabiré RK, Ranson H and Jones CM, The recent escalation in strength of  
717 pyrethroid resistance in *Anopheles coluzzi* in West Africa is linked to increased expression of  
718 multiple gene families. *BMC Genomics* **16**: 146 (2015).
- 719 78. Lockey KH, Lipids of the insect cuticle: origin, composition and function. *Comp Biochem*  
720 *Physiol B Biochem Mol Biol* **89**: 595-645 (1988).
- 721 79. Pan C, Zhou Y and Mo J, The clone of laccase gene and its potential function in cuticular  
722 penetration resistance of *Culex pipiens pallens* to fenvalerate. *Pestic Biochem Physiol* **93**: 105-  
723 111 (2009).
- 724 80. Noh MY, Kramer KJ, Muthukrishnan S, Beeman RW, Kanost MR and Arakane Y, Loss of  
725 function of the yellow-e gene causes dehydration-induced mortality of adult *Tribolium*  
726 *castaneum*. *Dev Biol* **399**: 315-324 (2015).

727

728

729

730

731

732

733

734

735

736

737

738

739

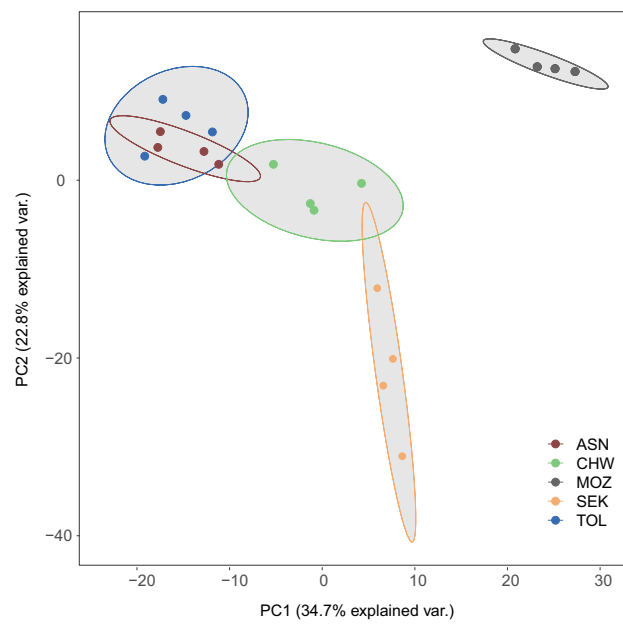

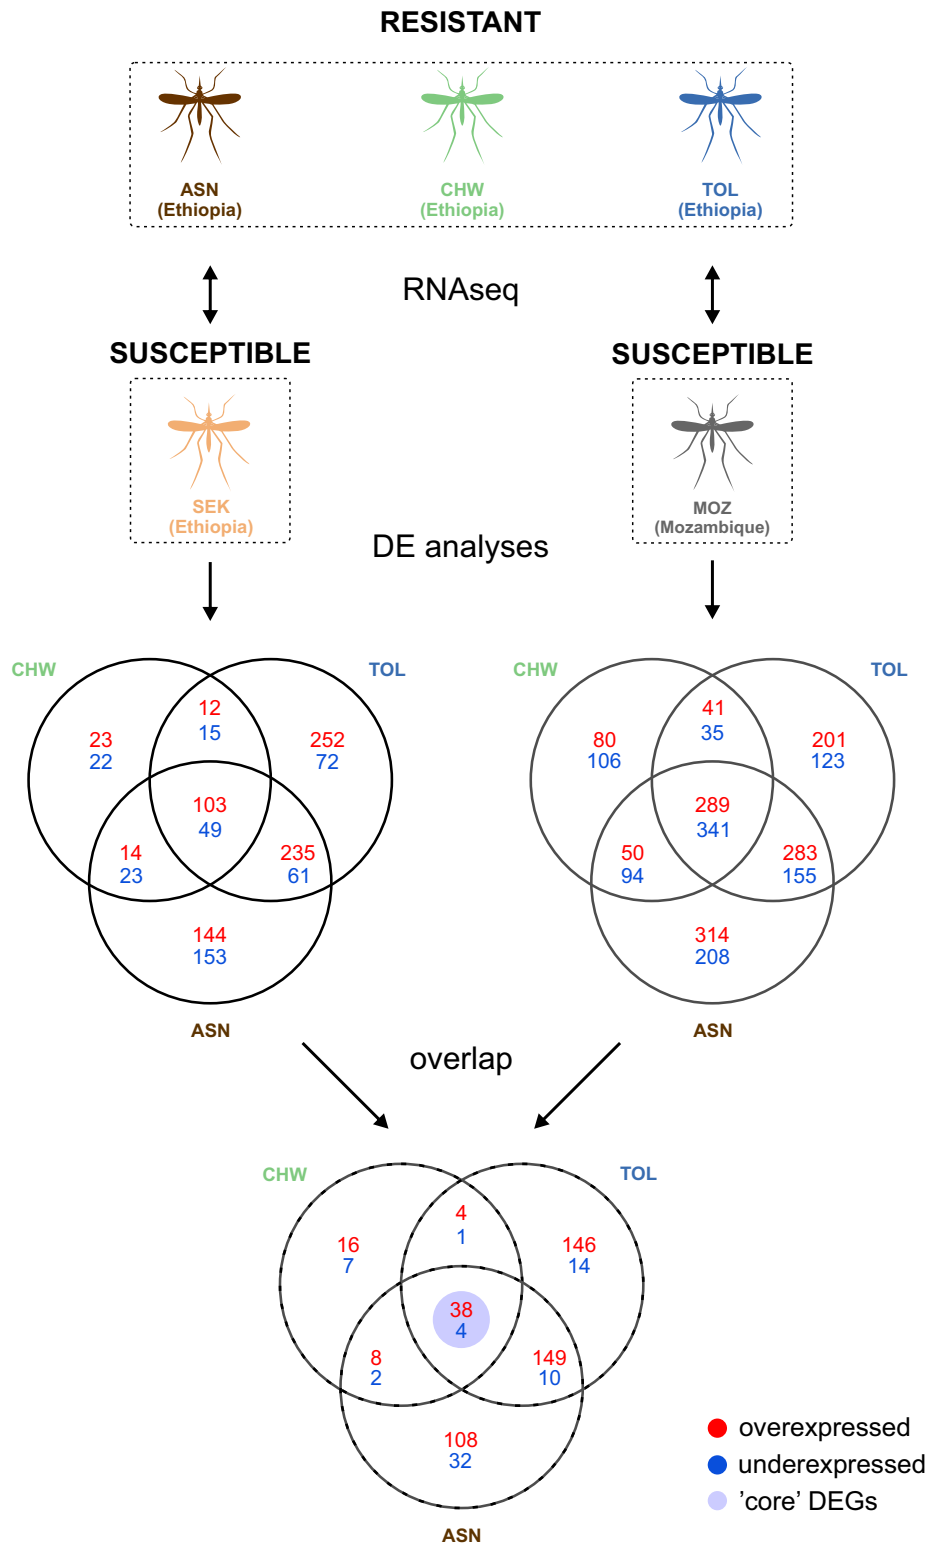

**Figure 2 - Experimental design and DEGs between three Ethiopian deltamethrin/DDT resistant populations and two susceptible strains of *An. arabiensis*.**

Differential gene expression was assessed between each resistant population (ASN, CHW or TOL) and each susceptible strain (SEK or MOZ) (FDR of 0.05,  $|\log_2$  FC change  $\geq 1$ ). Genes differentially expressed in each comparison of a deltamethrin/DDT resistant population against a susceptible strain are referred to as 'core' differentially expressed genes ('core' DEGs). For a list of all DEGs for each comparison, see Table S3.

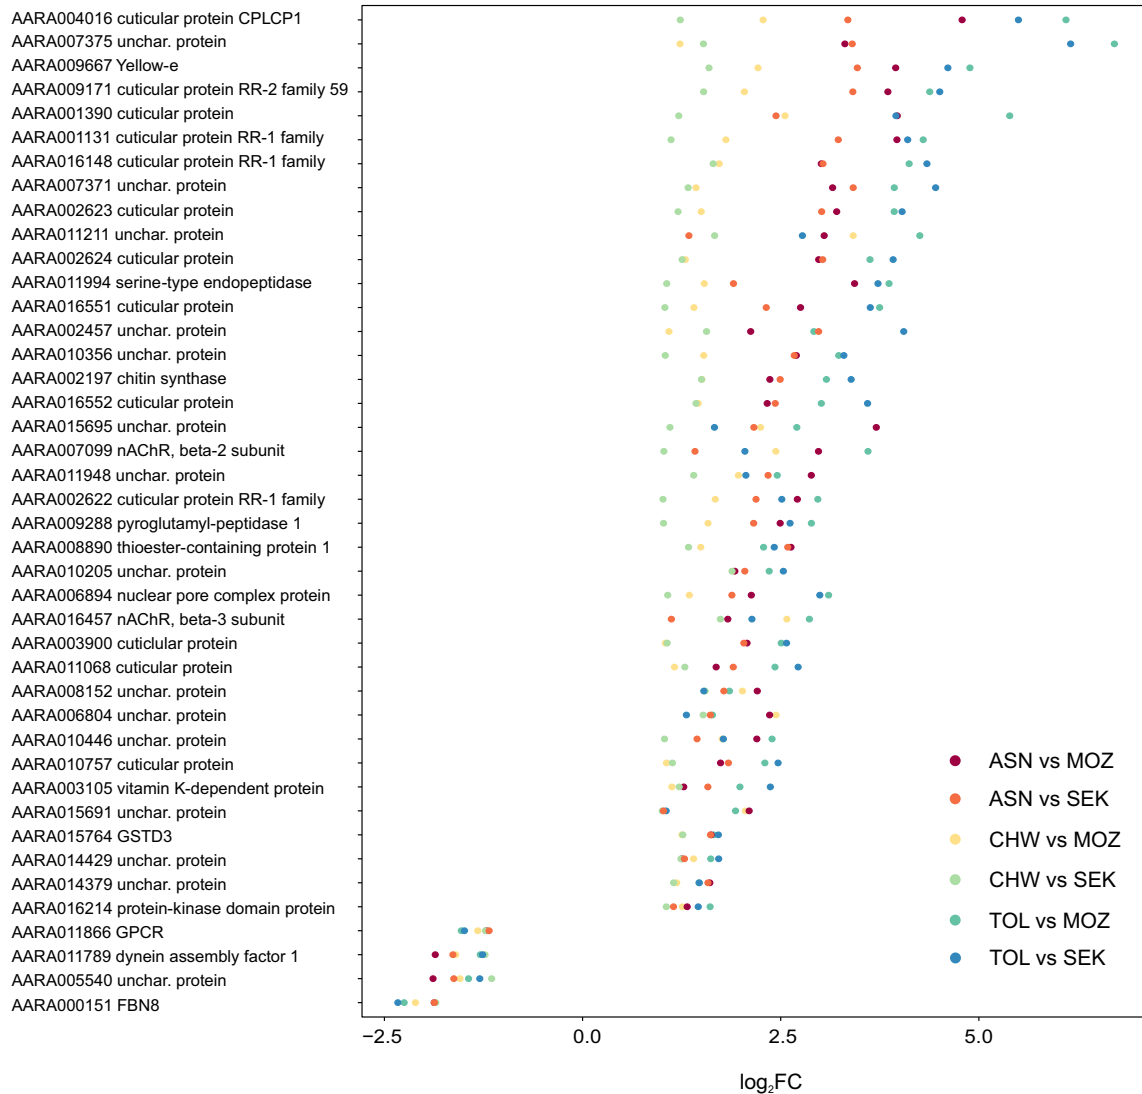

**Figure 3 - Identity of *An. arabiensis* 'core' DEGs and their fold change between Ethiopian deltamethrin/DDT resistant populations (ASN, CHW or TOL) and two susceptible strains (SEK or MOZ).**

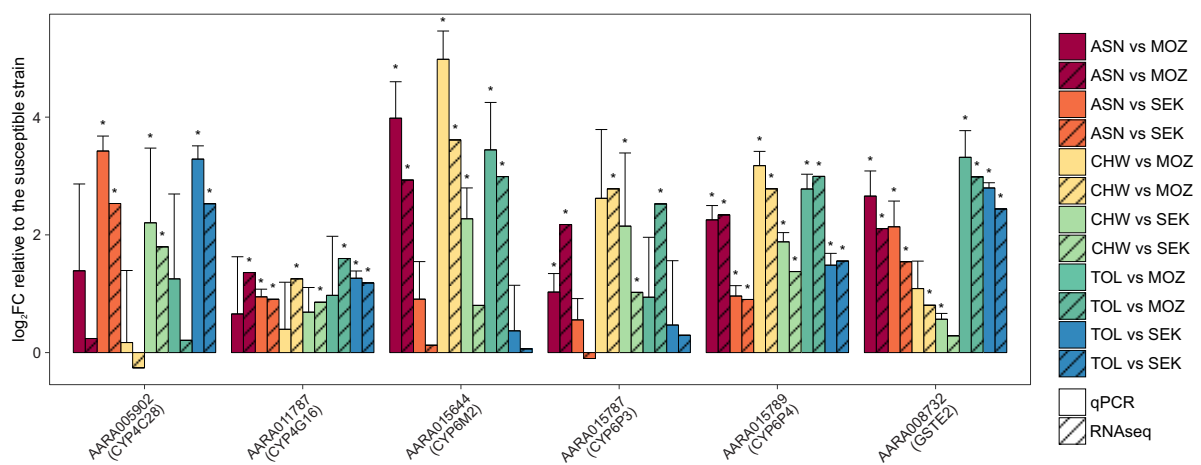

**Figure 4 - Expression levels of GST and P450 genes in Ethiopian deltamethrin/DDT resistant populations (ASN, CHW or TOL) compared to two susceptible strains (SEK or MOZ) of *An. arabiensis*.** An asterisk indicates whether a P450 or GST gene is significantly overexpressed, either based on RNAseq (FDR of 0.05, Table S3) or RT-qPCR data (student's unpaired t-test  $p$ -value < 0.05).

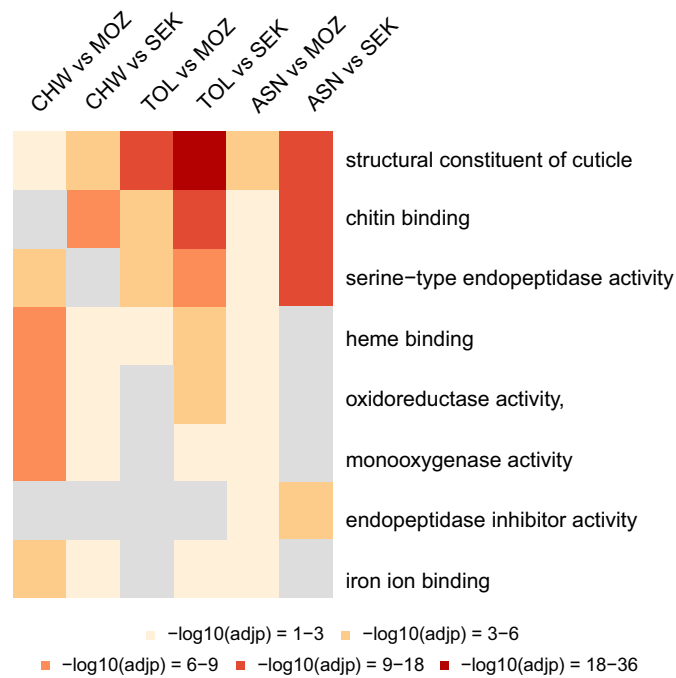

**Figure 5 - GO enrichment analysis of DEGs in three Ethiopian deltamethrin/DDT resistant populations (ASN, CHW or TOL) compared to two susceptible strains (SEK or MOZ) of *An. arabiensis*.** Heatmap showing the FDR of GO categories among DEGs of each comparison of a resistant population against a susceptible strain. A grey colored cell indicates that the GO category was not significantly enriched ( $\text{FDR} \geq 0.05$ ) for a given comparison. Only GO Molecular Function terms that were significantly overrepresented in both comparisons of a resistant population against SEK and MOZ are shown.



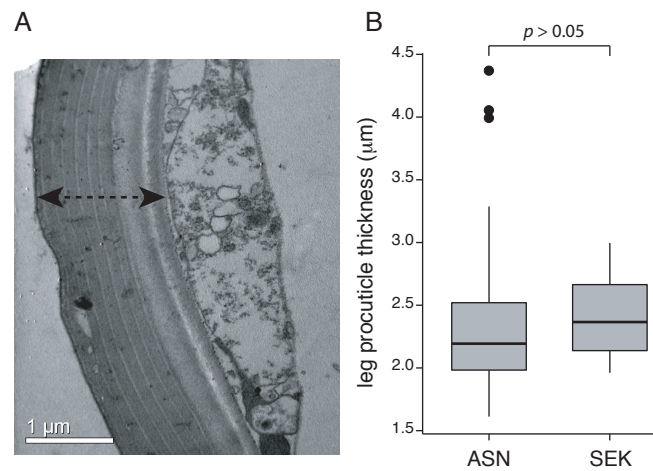

**Figure 6 - Leg procuticle thickness does not differ between a deltamethrin/DDT resistant population and a susceptible strain of *An. arabiensis***

A: Representative image of a cross section of the femur leg segment (SEK strain). Only the procuticle (indicated by a double headed arrow) was measured as the epicuticle was not preserved during preparation of sections. B: Box plot showing the distribution of leg procuticle thickness measurements of the deltamethrin/DDT resistant population (ASN) and the deltamethrin/DDT susceptible strain (SEK). Outliers are represented as black circular dots. Distributions were compared using a Mann-Whitney  $U$  test.

## 1 Supporting Information

2

3 **Table S1.** List of selected candidate genes for RT-qPCR validation and the used qPCR primer  
4 sequences.

5

6 **Table S2.** Read statistics for RNAseq samples of Ethiopian deltamethrin/DDT resistant  
7 populations (ASN, CHW and TOL) and two susceptible strains (SEK and MOZ) of *An.*  
8 *arabiensis*.

9

10 **Table S3.** Differentially expressed genes between Ethiopian deltamethrin/DDT resistant  
11 populations (ASN, CHW and TOL) and two susceptible strains (SEK and MOZ) of *An.*  
12 *arabiensis*.

13

14 **Table S4.** GO enrichment analysis of differentially expressed genes between Ethiopian  
15 deltamethrin/DDT resistant populations (ASN, CHW and TOL) and two susceptible strains  
16 (SEK and MOZ) of *An. arabiensis*.

17

18 **Table S5.** Ratio of resistance mutations in Ethiopian deltamethrin/DDT resistant populations  
19 (CHW, ASN and TOL) and two susceptible strains (SEK and MOZ) of *An. arabiensis*.

20

21 **Figure S1.** Map of Ethiopia showing the collection sites of the three deltamethrin/DDT resistant  
22 *An. arabiensis* populations.

23

24 **Figure S2.** RT-qPCR validation of differentially expressed genes between Ethiopian  
25 deltamethrin/DDT resistant populations (ASN, CHW and TOL) and two susceptible strains  
26 (SEK and MOZ). A tilde (~) indicates cuticle related genes. For a description of each gene see  
27 Table S1.

28

29 **Figure S3.** Expression heatmap of cuticle related genes of *An. arabiensis*

30 Cuticle related genes were defined as those genes coding for proteins with one of the following  
31 InterPro domains: IPR000618, IPR031311, IPR31874, IPR002557, IPR22727, IPR004302 or  
32 IPR004835. The log<sub>2</sub> transformed gene fold changes of the Ethiopian deltamethrin/DDT  
33 resistant populations ASN, CHW, TOL and the susceptible strain MOZ from Mozambique are  
34 relative to the susceptible SEK strain from Ethiopia. Genes without expression values in all

35 four comparisons were excluded from the heatmap. *Anopheles arabiensis* gene IDs are shown  
36 on the right.

37

38 **File S1.** Gene Transfer Format (GTF) used for mapping and counting of *An. arabiensis* RNAseq  
39 reads.

40
